# Supplementary material for: A Rapid Prototyping Approach for Multi-Material, Reversibly Sealed Microfluidics
Source: MDPI journal article supplement (doi:10.3390/mi14122213), 2023-12-07
Supplement: s1 [file s1]

## Supplementary Information for “A Rapid Prototyping Approach for Multi-material, Reversibly Sealed Microfluidics”

Michael Halwes<sup>1,2</sup>, Dr. Melanie Stamp<sup>1,2</sup>, Dr. David Collins<sup>1,2</sup>

<sup>1</sup>Department of Biomedical Engineering, University of Melbourne

<sup>2</sup>Graeme Clark Institute for Biomedical Engineering, University of Melbourne

| Parameter                  | 6mm Acrylic | 3mm Acrylic |
|----------------------------|-------------|-------------|
| Laser Power (%)            | 90          | 70          |
| Travel Speed (%)           | .4          | .7          |
| Laser Repetition Rate (Hz) | 5000        | 1000        |

*Table S1 Laser Cutting Parameters used for the acrylic components of the microfluidic device.*
